# Supplementary material for: Convergence of Mutation and Epigenetic Alterations Identifies Common Genes in Cancer That Predict for Poor Prognosis
Source: PLOS journal article supplement (doi:10.1371/journal.pmed.0050114), 2008-05-23
Supplement: S3 (10.1371/journal.pmed.0050114.s003) [file journal.pmed.0050114.s003]

**Table S3.** Primers used for methylation-specific PCR

| **Gene** | **Primer direction** | **Unmethylated** | **Methylated** |
| --- | --- | --- | --- |
| ABCA1 | Forward:  Reverse: | 5'- GGGTTGGGATTTGTAGAGTTGAGTTG -3’  5'- AAAACACCCTAAAAACCAACTCTATTAATACACA -3’ | 5'- GGGATTCGTAGAGTCGAGTC -3’  5'- CCCTAAAAACCGACTCTATTAATACGCG -3’ |
| ALS2CL | Forward:  Reverse: | 5'- TGTTTGTGGATGGGTGTTTGTGTTTTATG -3’  5'- CTACCACCAAAACCAAAAAACTAAACAAAAACCA -3’ | 5'- GGACGGGTGTTTGCGTTTTAC -3’  5'- CGAAACCAAAAAACTAAACGAAAACCG -3’ |
| APC2 | Forward:  Reverse: | 5'- TGGTAGTGTTGTTTGTTTAGGTTTGGATTG -3’  5'- ACCAAAAATCCCAACCCAAAATAACCTCAAAACA -3’ | 5'- GTCGTTTGTTTAGGTTCGGATC -3’  5'- GACCCGAAATAACCTCGAAACG -3’ |
| ARHGEF4 | Forward:  Reverse: | 5'- GAGGGGTTTTTTAGGGAGAATTTGTTTGTTGTG -3’  5'- CTACAACCTACAAAACAAACTCAAACCAAACA -3’ | 5'- GTTTTTTAGGGAGAATTCGTTCGTTGC -3’  5'- CTACGAAACAAACTCGAACCAAACG -3’ |
| BGN | Forward:  Reverse: | 5'- TTTTTGGTTTGTTGGATATATTGGATAGATAGATG -3’  5'- ACCAACCCTACCTAAAAAAAAAAAACACCAAACA-3’ | 5'- GTTCGTCGGATATATCGGATAGATAGAC -3’  5'- AACCCTACCTAAAAAAAAAAAACGCCAAACG -3’ |
| c14ORF21 | Forward:  Reverse: | 5'- TATTAGGTTGTAAGTGGTAATTTTGGTTGTTTTTG -3’  5'- TATCCCAAAACTTCCAAACTCAAATACAAATACA -3’ | 5'- GTAAGCGGTAATTTTGGTCGTTTTC -3’  5'- CAAAACTTCCGAACTCAAATACGAATACG -3’ |
| CD109 | Forward:  Reverse: | 5'- GTAGTGGATTGTAGTTTAGGTAGATGTTGTTG -3’  5'- CACAACAATACACACACAAAAAAAATAAACAACA -3’ | 5'- GATTGTAGTTTAGGTAGACGTCGTC -3’  5'- CGATACACACGCAAAAAAAATAAACGACG -3’ |
| CD248 | Forward:  Reverse: | 5'- GTTTGTTGTTGGTTTGGGTGGTTG -3’  5'- AAAAAAAACATAACAACTACTAAAACCACAAACA -3’ | 5'- TTGTTGGTTTGGGCGGTC -3’  5'- GTAACAACTACTAAAACCGCAAACG -3’ |
| CHD5 | Forward:  Reverse: | 5'- GGGAGGAGTGTTTGGGTTTTGTG -3’  5'- CAACAAACAAAACAACCTCAACAAAAAAATAACA -3’ | 5'- GAGCGTTCGGGTTTTGC -3’  5'- CGACCTCGACGAAAAAATAACG -3’ |
| COL7A1 | Forward:  Reverse: | 5'- GTTTGTTTTAGTGATTTGTATGTGTTTTTATGTTG -3’  5'- ACCAACCCTTCAAAAAAACTACAAACCTCA -3’ | 5'- TTTTAGTGATTTGTACGCGTTTTTACGTC -3’  5'- CCTTCGAAAAAACTACGAACCTCG -3’ |
| EPHB6 | Forward:  Reverse: | 5'- TTTGTTTTGTGGGTGTTTGATTTAAGTTGAGTTTG -3’  5'- CCTCCTCCCACAAATCTTAACCAAAAAAATCA -3’ | 5'- GGGTGTTCGATTTAAGTCGAGTTC -3’  5'- CGCGAATCTTAACCGAAAAAATCG -3’ |
| EVL | Forward:  Reverse: | 5'- TATGTGTTTGTGTATATGTTGGTTTGGGTATGTG -3’  5'- CTTCTCCAAATAAACATCAAAACCACTAACTACA -3’ | 5'- TCGGTTCGGGTACGC -3  5'- GTCGAAACCGCTAACTACG -3’ |
| GPNMB | Forward:  Reverse: | 5'- AGGTTTGAGATGTGGGTTGTGTTTTG -3’  5'- CCAAAAACATAAACATTTTCCCAAATCACAATCA -3’ | 5'- ACGTGGGTCGCGTTTC -3’  5'- TAAACGTTTTCCCGAATCGCAATCG -3’ |
| GUCY1A2 | Forward:  Reverse: | 5’- TTTAATGAGTATGATGGTGATATGTGATTTTTGTG -3’  5’- CCACTCACAAAAAAACTCCAAAAATATATAACCA- 3’ | 5’- GGCGATACGTGATTTTCGC -3’  5’- CTCACGAAAAAACTCCGAAAATATATAACCG -3’ |
| HDAC4 | Forward:  Reverse: | 5'- TGTTGTTTGAGTTTGAGTTTGAGTTTGTGTATTTG -3’  5'- CACCAAAAACCCAAACTAAAAAACTATTCAAACA -3’ | 5'- GAGTTCGAGTTCGCGTATTC -3’  5'- CCGAAAACCCAAACTAAAAAACTATTCGAACG -3’ |
| ICAM5 | Forward:  Reverse: | 5'- TTTAGTTTTGTGTTTTGGTTTTGTGTTTTTTATTG -3’  5'- TCCTAACAAAATACCAAAATACAAAAAAAATACA -3’ | 5'- CGTTTCGGTTTCGTGTTTTTTATC -3’  5'- CTAACAAAATACCGAAATACGAAAAAAATACG -3’ |
| LGR6 | Forward:  Reverse: | 5'- TGGGTAGGGGTATGGTTAGGTG -3’  5'- CCCTAACTACACACACATACCCAAAAACTAAACA -3’ | 5'- GTAGGGGTACGGTTAGGC -3‘  5'- GCACGTACCCGAAAACTAAACG -3‘ |
| MA MAP2 | Forward:  Reverse: | 5'- TTTTGAGGTTTTTATTTTGTGGTTTTTGTTTGGTG -3’  5'- ACAAACCCATAAACAACCACAACAAAACTAACA -3’ | 5'- TTTTTATTTCGCGGTTTTCGTTTGGC -3’  5'- CCGCGACGAAACTAACG -3’ |
| MKRN3 | Forward:  Reverse: | 5'- GTTTGTAGTTTTTTTAGAAGTTTATGAGGTAGTTG -3'  5'- AATTCCCCAAAAAACTCACAAACAAAAAAATCCA -3’ | 5'- GTTTGTAGTTTTTTTAGAAGTTTACGAGGTAGTC -3’  5'- CGAAAAACTCACAAACGAAAAAATCCG -3‘ |
| MMP2 | Forward:  Reverse: | 5'- GTGGTTATATGTATTGAGTTAGTGATTTTTGGGTG -3‘  5'- AAAAAACAAAACACCCTCAAAAAACCCATAAACA -3’ | 5'- CGCCCTCAAAAAACCCGTAAACG -3  5’- GTCGTAGTTCGAGTTTTAGACGC -3’ |
| NRCAM | Forward:  Reverse: | 5’- GATGTGTGTTGTAGTTTGAGTTTTAGATGTG -3’  5’- CAAAACCCTAAACCACCAATATCCTCCA -3’ | 5’- GTCGTAGTTCGAGTTTTAGACGC -3’  5’- TAAACCGCCGATATCCTCCG -3’ |
| OBSCN | Forward:  Reverse: | 5’- TATTTATGAGGTTTGTGTTGAGAATTTGTTGGGTG -3’  5’- AACACAACCATAAAAATCCCAAACCAACTAACCA -3’ | 5’- CGTCGAGAATTCGTTGGGC -3’  5’- GTAAAAATCCCGAACCGACTAACCG -3’ |
| PCDHB15 | Forward:  Reverse: | 5'- TGTTTGTGAGAATAATAGTTTTGTTTTGTATATTG -3‘  5'- AACAACAAATAAATAACCTAAACATTAATACCCA -3‘ | 5'- GCGAGAATAATAGTTTCGTTTTGTATATC -3‘  5'- AACGAATAAATAACCTAAACGTTAATACCCG -3‘ |
| PTPRD | Forward:  Reverse: | 5'- TGGTGGGGTTTGTTTAGGTTGTG -3‘  5'- ATACTCCAAACACCCACTAAAAAAAAAAACAACA -3‘ | 5'- GGGGTTCGTTTAGGTCGC -3‘  5'- CGCCCGCTAAAAAAAAAAACGACG -3‘ |
| RET | Forward:  Reverse: | 5'- TTGGTTTTGTTTGGTTTATTTTTGGATTGTTTTTG -3‘  5'- CTACACACCCTACTTCAATCACAAAACTAAAACA -3‘ | 5'- GGTTTCGTTTGGTTTATTTTTGGATCGTTTTC -3‘  5'- CTACTTCGATCGCGAAACTAAAACG -3‘ |
| RNF182 | Forward:  Reverse: | 5'- GTAGAGATAAAGTCGTTCGTTCGTTAGTTC -3‘  5'- GCTCCGACTACGACG -3’ | 5'- GTCGTAGAGATAAAGTCGTTCGTTC -3‘  5'- GCTCCGACTACGACG -3‘ |
| SEMA5B | Forward:  Reverse: | 5'- GGAGTTTTAGGTTTTGTTGTTGGAATGTTG -3‘  5'- CTACATCCCACAACTACTCAACCA -3‘ | 5'- GTTTTAGGTTTTGTCGTCGGAATGTC -3‘  5'- GCGACTACTCGACCG -3‘ |
| SERPINB1 | Forward:  Reverse | 5'- TGGTTGTTGGTTTGGGTGATGTTTTTG -3‘  5'- CAAAACACACTCCAAACTCCAAACTAAATACA -3‘ | 5'- GTTGGTTCGGGTGACGTTTTC -3‘  5'- CTCCGAACTCCGAACTAAATACG -3‘ |
| SORL1 | Forward:  Reverese: | 5'- GTGTTATTTGTAGTAGTGTTTGTTTGAATATGGTG -3‘  5'- CTACATCCAAACTTCACAAAAAACTCCAAACA -3‘ | 5'- TAGCGTTCGTTCGAATATGGC -3‘  5'- AAACTTCGCAAAAAACTCCGAACG -3‘ |
| STARD8 | Forward:  Reverse: | 5'- TAGGGATTGGGTTGGTTTTTGTTGAGTTTTG -3‘  5'- ATAAAAAACTTCTAAAACCAACAAAACTATACCA -3‘ | 5'- GGGTTGGTTTTCGTCGAGTTTC -3‘  5'- TTCTAAAACCGACGAAACTATACCG -3‘ |
| SULF2 | Forward:  Reverse: | 5'- TGTGGTTAGTTGAGTTTGGAGGTATTG -3‘  5'- CCCAAAATCCAACTCCAAACAAAACAATAAACA -3‘ | 5'- GTTAGTCGAGTTCGGAGGTATC -3‘  5'- CAACTCCGAACGAAACAATAAACG -3‘ |
| SYNE1 | Forward:  Reverse: | 5'- GTGGTTGGGTTTTTGTAGTTTTGTAGATTGTG -3‘  5'- CAACTCTCTACACCCAAACTCAACA -3‘ | 5'- GTTGGGTTTTCGTAGTTTTGTAGATCGC -3‘  5'- CTACGCCCAAACTCGACG -3‘ |
| TTLL3 | Forward:  Reverse: | 5’- GTTGTGGAAGTTGTAGTTGTTTGAGTTATG -3’  5’- CACCTACATAACCCTCCTCAAACTAAACA -3’ | 5’- GAAGTCGTAGTCGTTCGAGTTAC -3’  5’- GTAACCCTCCTCGAACTAAACG -3’ |
| ZNF432 | Forward:  Reverse: | 5’- AAATTGGATAGTTTAAGAGGTTTTTGTTTATTGTG -3‘  5'- CACTCTAAAAACAACCATCTTTAAATACATAACA -3‘ | 5'- GATAGTTTAAGAGGTTTTCGTTTATCGC -3‘  5'- CTCTAAAAACGACCATCTTTAAATACGTAACG -3‘ |
| ZNF442 | Forward:  Reverse: | 5'- TTTGGTTTAGTTGGTTTTTAGTTTTTTTGGTTGTG -3‘  5'- AACCACAATTACTACACAAAAACAAAACAAAACA -3‘ | 5'- TCGGTTTTTAGTTTTTTCGGTCGC -3‘  5'- CAATTACTACGCAAAAACGAAACAAAACG -3‘ |
| ZNF569 | Forward:  Reverse: | 5’- ATATATTGAGTTGGGTTTTTTTTATGGATTTTGTG -3’  5’- CACAAAAAAACTCAACCTAAATTTTACACAAACA -3’ | 5’- ATATATTGAGTCGGGTTTTTTTTACGGATTTTGC -3’  5’- GCAAAAAAACTCAACCTAAATTTTACACGAACG -3’ |
